# Supplementary material for: Identification of crucial stepping stone habitats for biodiversity conservation in northeastern Madagascar using remote sensing and comparative predictive modeling
Source: Springer Nature journal article supplement (doi:10.1007/s10531-020-01965-z), 2020-03-10
Supplement: MOESM1 [file 17787516]

**Supplementary material**

Table S1: Technical details of satellite images used for land cover mapping.

| **Date** | **Satellite** | **Path/row or tile** |  |
| --- | --- | --- | --- |
| 22.08.1996 | Landsat 5 TM | 158/070 |  |
| 19.06.1990 | 158/071 |  |
| 07.09.1990 | 158/071 |  |
| 14.08.1993 | 158/071 |  |
| 19.06.1990 | 158/072 |  |
| 08.04.1993 | 158/072 |  |
| 24.08.2014 | Landsat 8 OLI/TIRS | 158/070 |  |
| 24.08.2014 | 158/071 |  |
| 24.08.2014 | 158/072 |  |
| 05.06.2018 | Sentinel-2 | T39KTA |  |
| 11.05.2018 |  | T39KTB |  |
| 05.06.2018 |  | T39KUA |  |
| 07.11.2017 |  | T39KUB |  |
| 05.06.2018 |  | T39LTC |  |
| 18.10.2017 |  | T39LTD |  |
| 28.10.2018 |  | T39LUD |  |

Table S2: Definition of explanatory variables used for the modeling. The JAXA (2015) digital elevation model has a resolution of 30x30 m.

| **Variable & abbreviation** | | **Description** | **Generation of data** |
| --- | --- | --- | --- |
| Elevation | elev | Height above sea level in meters | Derived from JAXA (2015) digital elevation model |
| Inclination | incl | Inclination of a slope given in degrees | Calculated from JAXA (2015) digital elevation model |
| Protection | prot | Status of protection as binary variable | Derived from UNEP-WCMC and IUCN (2018) database |
| Distance to large river | rive | Aerial distance (in m) to the closest of the major rivers | Rivers were modeled from JAXA (2015) digital elevation model and major rivers selected |
| Distance to minor valley | vall | Aerial distance (in m) to the closest minor valley/minor river | Rivers were modeled from JAXA (2015) digital elevation model and minor rivers selected |
| Distance to pathway | path | Aerial distance (in m) to the closest major pathway | Location of pathways was defined based on key informant interviews and then derived from Google Earth images |
| Distance to village  (in 1990s) | vill | Aerial distance (in m) to the closest village | Position of villages was derived from Google Earth images and size was estimated |
| Distance to forest edge  (in 1990s) | edge | Aerial distance (in m) to closest forest edge in 1990s forest extent | Derived from 1990s land cover map (see above) |
| Distance to forest edge in 2018 | edge_  2018 | Aerial distance (in m) to closest forest edge in 2018 forest extent | Derived from 2018 land cover map (see above) |
| Density of forest | dfor | Proportion of forested areas within 1 km² in 1990 | Derived form 1990 land cover map |
| Distance to village in 1990 | vill_1990 | Aerial distance (m) to the closest village without taking villages into account that were established since 1990 (s. below) | Derived from “vill” data set (see above). |

Table S3: Accuracy assessment of 1990 land cover map for the study area based on visual interpretation of 258 randomly distributed points. Overall accuracy is given in bold.

|  | Water | Forest | Non-forest | Open soil | Total | User’s accuracy |
| --- | --- | --- | --- | --- | --- | --- |
| Water | 11 | 0 | 0 | 0 | 11 | 1.000 |
| Forest | 0 | 110 | 5 | 0 | 115 | 0.957 |
| Non-Forest | 0 | 5 | 115 | 2 | 122 | 0.943 |
| Open soil | 0 | 0 | 1 | 9 | 10 | 0.900 |
| Total | 11 | 115 | 121 | 11 | 258 |  |
| Producer’s accuracy | 1.000 | 0.957 | 0.950 | 0.818 |  | **0.949** |

Table S4: Accuracy assessment of 2018 land cover map for the study area based on visual interpretation of 258 randomly distributed points. Overall accuracy is given in bold.

|  | Water | Forest | Non-forest | Open soil | Total | User’s accuracy |
| --- | --- | --- | --- | --- | --- | --- |
| Water | 10 | 0 | 0 | 0 | 10 | 1.000 |
| Forest | 0 | 76 | 3 | 0 | 79 | 0.962 |
| Non-Forest | 0 | 5 | 149 | 0 | 154 | 0.968 |
| Open soil | 0 | 0 | 1 | 14 | 15 | 0.933 |
| Total | 10 | 81 | 153 | 14 | 258 |  |
| Producer’s accuracy | 1.000 | 0.938 | 0.974 | 1.000 |  | **0.965** |

Table S5: Accuracy assessment of 2018 land cover map for the study area using 277 independent vegetation plots from 2019. Overall accuracy is given in bold.

|  | Water | Forest | Non-forest | Open soil | Total | User’s accuracy |
| --- | --- | --- | --- | --- | --- | --- |
| Water | 12 | 0 | 0 | 0 | 12 | 1.000 |
| Forest | 0 | 96 | 1 | 0 | 97 | 0.990 |
| Non-Forest | 0 | 2 | 146 | 1 | 149 | 0.980 |
| Open soil | 0 | 0 | 2 | 17 | 19 | 0.895 |
| Total | 12 | 98 | 149 | 18 | 277 |  |
| Producer’s accuracy | 1.00 | 0.980 | 0.980 | 0.944 |  | **0.978** |

Table S6: Validation metrics for all models returned from the three different modeling approaches to explain the observed pattern of forest development. Models with the same number are based on the same randomly generated dataset. The selected “best” model is given in bold. Abbreviations: LR = logistic regression; MARS = multivariate adaptive regression splines; ANN = artificial neural network; AME = absolute maximum error; MAE = mean absolute error; RMSE = root squared mean error; AIC = Akaike Information Criterion; R² = coefficient of determination; IoAd = index of agreement; AUC = area under the Receiver Operating curve.

| **Model** | **AME** | **MAE** | **RMSE** | **AIC** | **R²** | **IoAd** | **AUC** |
| --- | --- | --- | --- | --- | --- | --- | --- |
| LR1 | 8.618 | 1.180 | 1.763 | 1224.023 | 0.260 | 0.418 | 0.820 |
| LR2 | 6.915 | 1.127 | 1.621 | 1054.609 | 0.272 | 0.448 | 0.819 |
| LR3 | 10.394 | 1.299 | 1.999 | 1419.330 | 0.238 | 0.378 | 0.811 |
| LR4 | 8.002 | 1.123 | 1.638 | 1072.241 | 0.263 | 0.442 | 0.816 |
| LR5 | 9.772 | 1.185 | 1.847 | 1288.220 | 0.240 | 0.397 | 0.816 |
| LR6 | 8.576 | 1.202 | 1.795 | 1226.133 | 0.283 | 0.422 | 0.831 |
| LR7 | 8.615 | 1.148 | 1.711 | 1128.462 | 0.241 | 0.423 | 0.812 |
| LR8 | 10.649 | 1.276 | 2.002 | 1462.541 | 0.245 | 0.380 | 0.827 |
| **LR9** | **6.757** | **1.099** | **1.540** | **928.082** | **0.287** | **0.472** | **0.827** |
| LR10 | 7.616 | 1.199 | 1.721 | 1136.038 | 0.266 | 0.432 | 0.810 |
| MARS1 | 5.185 | 1.231 | 1.533 | 947.337 | 0.332 | 0.501 | 0.834 |
| MARS2 | 5.221 | 1.274 | 2.129 | 1052.937 | 0.317 | 0.482 | 0.825 |
| MARS3 | 4.285 | 1.275 | 1.895 | 921.788 | 0.308 | 0.499 | 0.820 |
| MARS4 | 6.350 | 1.293 | 1.625 | 1065.653 | 0.302 | 0.480 | 0.818 |
| MARS5 | 4.788 | 1.321 | 1.643 | 1063.892 | 0.317 | 0.481 | 0.825 |
| MARS6 | 6.577 | 1.322 | 1.741 | 1175.959 | 0.348 | 0.463 | 0.845 |
| **MARS7** | **5.124** | **1.183** | **1.491** | **864.280** | **0.296** | **0.499** | **0.815** |
| MARS8 | 5.582 | 1.321 | 1.643 | 1073.551 | 0.335 | 0.486 | 0.834 |
| MARS9 | 5.138 | 1.251 | 1.552 | 953.447 | 0.344 | 0.502 | 0.839 |
| MARS10 | 5.314 | 1.255 | 1.576 | 972.479 | 0.316 | 0.490 | 0.823 |
| **ANN1** | **0.988** | **0.313** | **0.403** | **-1769.853** | **0.351** | **0.742** | **0.841** |
| ANN2 | 0.974 | 0.321 | 0.419 | -1766.337 | 0.308 | 0.729 | 0.818 |
| ANN3 | 0.971 | 0.323 | 0.417 | -1690.288 | 0.312 | 0.727 | 0.822 |
| ANN4 | 0.995 | 0.332 | 0.426 | -1723.418 | 0.285 | 0.713 | 0.808 |
| ANN5 | 1.000 | 0.326 | 0.420 | -1707.704 | 0.302 | 0.722 | 0.818 |
| ANN6 | 0.997 | 0.315 | 0.407 | -1764.689 | 0.344 | 0.740 | 0.835 |
| ANN7 | 0.987 | 0.328 | 0.419 | -1704.680 | 0.306 | 0.719 | 0.817 |
| ANN8 | 0.980 | 0.330 | 0.420 | -1725.555 | 0.301 | 0.717 | 0.814 |
| ANN9 | 0.988 | 0.316 | 0.409 | -1769.698 | 0.341 | 0.740 | 0.836 |
| ANN10 | 0.995 | 0.324 | 0.416 | -1709.138 | 0.311 | 0.727 | 0.818 |

Table S7: Validation metrics for all models returned from the three different modeling approaches to explain the observed pattern of settlement expansion. Models with the same number are based on the same randomly generated dataset. The selected “best” model is given in bold. Abbreviations: LR = logistic regression; MARS = multivariate adaptive regression splines; ANN = artificial neural network; AME = absolute maximum error; MAE = mean absolute error; RMSE = root squared mean error; AIC = Akaike Information Criterion; R² = coefficient of determination; IoAd = index of agreement; AUC = area under the Receiver Operating curve.

| **Model** | **AME** | **MAE** | **RMSE** | **AIC** | **R²** | **IoAd** | **AUC** |
| --- | --- | --- | --- | --- | --- | --- | --- |
| LR1 | 6.949 | 1.196 | 1.529 | 229.331 | 0.269 | 0.482 | 0.804 |
| LR2 | 6.076 | 1.183 | 1.508 | 217.788 | 0.290 | 0.492 | 0.814 |
| LR3 | 7.388 | 1.153 | 1.550 | 224.234 | 0.272 | 0.478 | 0.816 |
| LR4 | 4.772 | 1.176 | 1.469 | 195.772 | 0.302 | 0.505 | 0.817 |
| **LR5** | **6.358** | **1.034** | **1.339** | **175.034** | **0.297** | **0.518** | **0.828** |
| LR6 | 7.184 | 1.245 | 1.689 | 278.105 | 0.254 | 0.443 | 0.797 |
| LR7 | 6.167 | 1.190 | 1.536 | 227.785 | 0.261 | 0.477 | 0.792 |
| LR8 | 5.331 | 1.082 | 1.430 | 204.532 | 0.270 | 0.495 | 0.803 |
| LR9 | 7.158 | 1.093 | 1.462 | 208.377 | 0.300 | 0.498 | 0.830 |
| LR10 | 6.086 | 1.066 | 1.389 | 181.872 | 0.244 | 0.490 | 0.786 |
| MARS1 | 5.762 | 1.352 | 1.769 | 297.668 | 0.282 | 0.444 | 0.816 |
| MARS2 | 4.137 | 1.284 | 1.574 | 244.276 | 0.289 | 0.490 | 0.817 |
| MARS3 | 3.844 | 1.189 | 1.476 | 215.978 | 0.307 | 0.513 | 0.824 |
| MARS4 | 4.886 | 1.346 | 1.656 | 248.080 | 0.346 | 0.485 | 0.845 |
| **MARS5** | **4.029** | **1.107** | **1.365** | **192.647** | **0.353** | **0.538** | **0.856** |
| MARS6 | 8.735 | 1.223 | 1.682 | 286.413 | 0.309 | 0.455 | 0.831 |
| MARS7 | 3.997 | 1.319 | 1.583 | 249.582 | 0.253 | 0.483 | 0.790 |
| MARS8 | 5.867 | 1.154 | 1.508 | 235.933 | 0.258 | 0.482 | 0.801 |
| MARS9 | 7.825 | 1.100 | 1.388 | 198.111 | 0.313 | 0.522 | 0.827 |
| MARS10 | 4.994 | 1.141 | 1.512 | 223.468 | 0.228 | 0.462 | 0.776 |
| ANN1 | 0.999 | 0.315 | 0.417 | -320.979 | 0.326 | 0.733 | 0.837 |
| ANN2 | 0.981 | 0.337 | 0.426 | -301.366 | 0.281 | 0.705 | 0.805 |
| ANN3 | 0.991 | 0.320 | 0.439 | -280.961 | 0.281 | 0.723 | 0.799 |
| ANN4 | 0.990 | 0.313 | 0.416 | -281.260 | 0.356 | 0.736 | 0.851 |
| ANN5 | 0.981 | 0.314 | 0.407 | -326.310 | 0.338 | 0.732 | 0.837 |
| ANN6 | 0.999 | 0.325 | 0.433 | -320.194 | 0.276 | 0.715 | 0.803 |
| ANN7 | 0.999 | 0.333 | 0.432 | -299.788 | 0.280 | 0.709 | 0.803 |
| ANN8 | 0.969 | 0.331 | 0.424 | -318.391 | 0.288 | 0.711 | 0.808 |
| **ANN9** | **1.000** | **0.302** | **0.402** | **-328.588** | **0.377** | **0.753** | **0.856** |
| ANN10 | 0.984 | 0.340 | 0.430 | -284.858 | 0.278 | 0.690 | 0.807 |


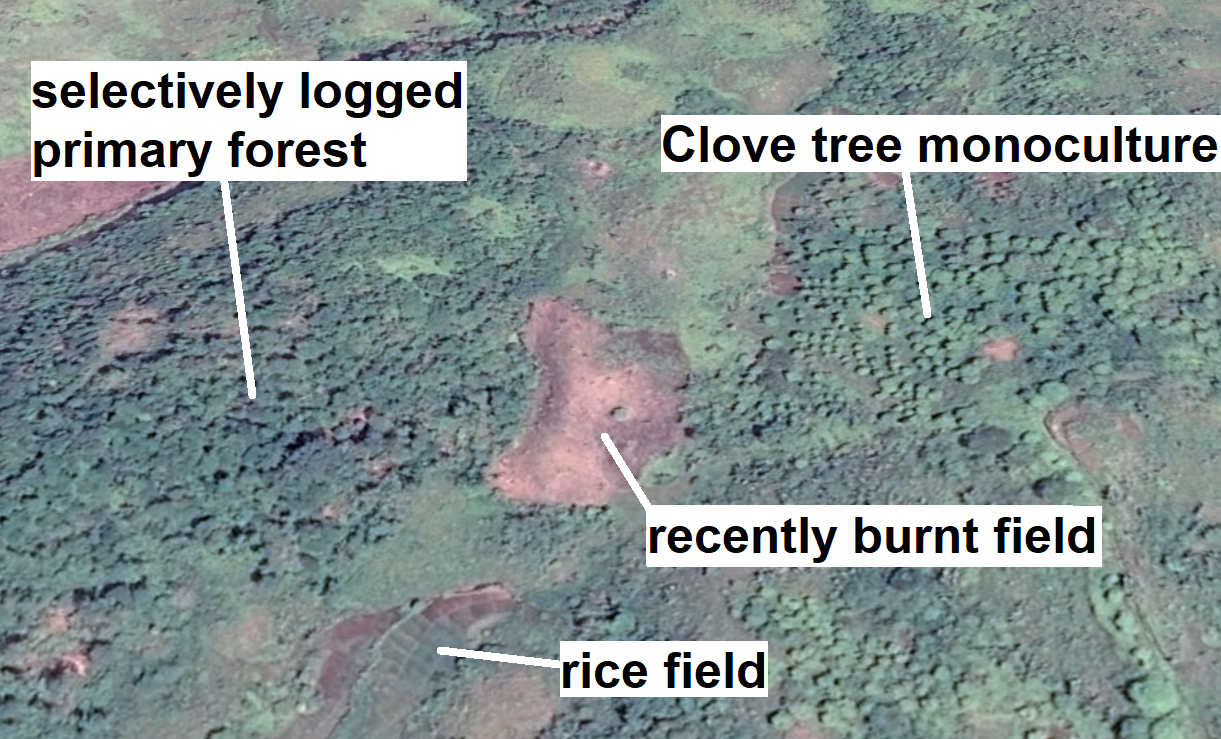


Figure S1: Exemplary Google Earth image illustrating different visual appearance of clove tree monoculture, selectively logged primary forest, rice fields and recently burnt fields. Image taken at 16°26’27.98’’S 49°48’56.71’’E on May 2nd 2017 and area surveyed in August 2017.
